# Supplementary material for: Referral Pathways for Children with Atopic Diseases in Denmark
Source: PubMed Central journal article supplement — Acta Derm Venereol. 2024 Jun 3;104:34961. doi: 10.2340/actadv.v104.34961 (PMC11161810; doi:10.2340/actadv.v104.34961), 2024-06-03
Supplement: ActaDV-104-34961-s1.pdf [file ActaDV-104-34961-s1.pdf]

Supplementary material has been published as submitted. It has not been copyedited, or typeset by Acta Dermato-Venereologica

Table SI. Detailed version of characteristics of children 0-17 years with atopic dermatitis, food allergy, allergic rhinoconjunctivitis, and/or asthma

|                                                         | All participants | Practicing specialist % (n/N of total) |               |               |                            | Hospital % (n/N of total) |                         |                           |
|---------------------------------------------------------|------------------|----------------------------------------|---------------|---------------|----------------------------|---------------------------|-------------------------|---------------------------|
|                                                         |                  | Total                                  | Pediatrician  | Dermatologist | Otorhino-<br>laryngologist | Total                     | Pediatric<br>department | Dermatology<br>department |
| Gender, boys                                            | 63 % (175/277)   | 61 % (68/112)                          | 58 % (58/100) | 71 % (5/7)    | 100 % (5/5)                | 65 % (107/165)            | 65 % (79/122)           | 65 % (28/43)              |
| Age, years, median (95% CI)                             | 10 (9-10)        | 10 (9-12)                              | 10 (9-12)     | 0 (0-2)       | 13 (-)                     | 9 (8-10)                  | 10 (9-11)               | 4 (3-9)                   |
| Parents living together, Yes                            | 82 % (227/277)   | 83 % (93/112)                          | 81 % (82/101) | 100 % (6/6)   | 100 % (5/5)                | 81 % (134/165)            | 79 % (96/121)           | 86 % (38/44)              |
| Household income                                        |                  |                                        |               |               |                            |                           |                         |                           |
| < 400.000 DKK/year                                      | 5 % (15/277)     | 5 % (5/111)                            | 5 % (5/100)   | 0 % (0/6)     | 0 % (0/5)                  | 6 % (10/166)              | 4 % (5/122)             | 11 % (5/44)               |
| 400.000-800.000 DKK/year                                | 34 % (93/277)    | 34 % (38/111)                          | 34 % (34/100) | 50 % (3/6)    | 20 % (1/5)                 | 33 % (55/166)             | 30 % (37/122)           | 41 % (18/44)              |
| > 800.000 DKK/year                                      | 48 % (134/277)   | 49 % (54/111)                          | 48 % (48/100) | 50 % (3/6)    | 60 % (3/5)                 | 48 % (80/166)             | 51 % (62/122)           | 41 % (18/44)              |
| Do not know/ do not want to disclose                    | 13 % (35/277)    | 13 % (14/111)                          | 13 % (13/100) | 0 % (0/6)     | 20 % (1/5)                 | 13 % (21/166)             | 15 % (18/122)           | 7 % (3/44)                |
| Parents educational level                               |                  |                                        |               |               |                            |                           |                         |                           |
| Mothers                                                 |                  |                                        |               |               |                            |                           |                         |                           |
| - Primary school                                        | 1 % (3/277)      | 0 % (0/112)                            | 0 % (0/101)   | 0 % (0/6)     | 0 % (0/5)                  | 2 % (3/165)               | 2 % (2/122)             | 2 % (1/43)                |
| - High school and vocational school                     | 9 % (24/277)     | 11 % (12/112)                          | 10 % (10/101) | 0 % (0/6)     | 40 % (2/5)                 | 7 % (12/165)              | 7 % (8/122)             | 9 % (4/43)                |
| - Short and medium (bachelor) cycle<br>higher education | 47 % (129/277)   | 50 % (56/112)                          | 51 % (52/101) | 17 % (1/6)    | 60 % (3/5)                 | 44 % (73/165)             | 45 % (55/122)           | 42 % (18/43)              |
| - Long cycle higher (master)<br>education               | 40 % (112/277)   | 37 % (41/112)                          | 36 % (36/101) | 83 % (5/6)    | 0 % (0/5)                  | 43 % (71/165)             | 42 % (51/122)           | 47 % (20/43)              |
| Fathers                                                 |                  |                                        |               |               |                            |                           |                         |                           |
| - Primary school                                        | 3 % (9/272)      | 3 % (3/110)                            | 2 % (2/99)    | 0 % (0/6)     | 20 % (1/5)                 | 4 % (6/162)               | 3 % (4/120)             | 5 % (2/42)                |

|                                                      |                |               |              |            |            |                |               |              |
|------------------------------------------------------|----------------|---------------|--------------|------------|------------|----------------|---------------|--------------|
| - High school and vocational school                  | 22 % (60/272)  | 29 % (32/110) | 30 % (30/99) | 0 % (0/6)  | 40 % (2/5) | 17 % (28/162)  | 14 % (17/120) | 26 % (11/42) |
| - Short and medium (bachelor) cycle higher education | 27 % (74/272)  | 27 % (30/110) | 28 % (28/99) | 33 % (2/6) | 0 % (0/5)  | 27 % (44/162)  | 28 % (33/120) | 26 % (11/42) |
| - Long cycle higher (master) education               | 44 % (120/272) | 37 % (41/110) | 35 % (35/99) | 67 % (4/6) | 40 % (2/5) | 49 % (79/162)  | 54 % (65/120) | 33 % (14/42) |
| Family history of atopic diseases                    |                |               |              |            |            |                |               |              |
| - AD                                                 | 36 % (98/274)  | 32 % (36/110) | 32 % (31/98) | 57 % (4/7) | 20 % (1/5) | 38 % (62/164)  | 31 % (38/122) | 57 % (24/42) |
| - Food allergy                                       | 29 % (79/274)  | 28 % (31/110) | 31 % (30/98) | 0 % (0/7)  | 20 % (1/5) | 29 % (48/164)  | 26 % (32/122) | 38 % (16/42) |
| - ARC                                                | 62 % (169/274) | 60 % (66/110) | 60 % (59/98) | 57 % (4/7) | 60 % (3/5) | 63 % (103/164) | 62 % (76/122) | 64 % (27/42) |
| - Asthma                                             | 34 % (94/274)  | 34 % (38/110) | 37 % (36/98) | 14 % (1/7) | 20 % (1/5) | 34 % (56/164)  | 34 % (42/122) | 33 % (14/42) |
| - None                                               | 18 % (49/274)  | 17 % (19/110) | 17 % (17/98) | 29 % (2/7) | 0 % (0/5)  | 18 % (30/164)  | 21 % (26/122) | 9 % (4/42)   |

Data are summarized as percent (number of total) or median (95% confidence interval)

AD: atopic dermatitis; ARC: allergic rhinoconjunctivitis; CI: confidence interval; n: number.
